# Supplementary material for: Analysis of high-molecular-weight fructan polymers in crude plant extracts by high-resolution LC-MS
Source: PubMed Central journal article supplement — Anal Bioanal Chem. 2011 Sep 17;401(9):2955–63. doi: 10.1007/s00216-011-5374-8 (PMC3204112; doi:10.1007/s00216-011-5374-8), 2011-09-17
Supplement: 216_2011_5374_MOESM1_ESM.pdf [file 216_2011_5374_MOESM1_ESM.pdf]

**Analytical and Bioanalytical Chemistry**

**Electronic Supplementary Material**

**Analysis of high-molecular-weight fructan polymers in crude  
plant extracts by high-resolution LC-MS**

Scott Harrison

**Table S1** Monoisotopic masses of fructan polymers between DP1 and 108, showing formula, elemental composition and expected m/z for charge states -1 and -6. The normally observed charge states are highlighted



**Table S2** Monoisotopic, singly negatively charged mass, expected m/z value and relative intensity as calculated by IDCalc, for DP1,10, 20, 30, 40, 50, 60, 70, 80 and 90 at the observed charge state. Most intense isotopic peak highlighted in yellow

| DP&Charge State |    | Ions (Above1%)            |           |           |           |           |           |           |           |           |           |           |           |           |           |           |           |           |           |           |
|-----------------|----|---------------------------|-----------|-----------|-----------|-----------|-----------|-----------|-----------|-----------|-----------|-----------|-----------|-----------|-----------|-----------|-----------|-----------|-----------|-----------|
| DP1             | -1 | Isotopic Mass (da)        | 180.063   | 181.066   | 182.068   |           |           |           |           |           |           |           |           |           |           |           |           |           |           |           |
|                 |    | Singly Charged Ionic Mass | 179.056   | 180.059   | 181.061   |           |           |           |           |           |           |           |           |           |           |           |           |           |           |           |
|                 |    | Expected m/z              | 179.056   | 180.059   | 181.061   |           |           |           |           |           |           |           |           |           |           |           |           |           |           |           |
|                 |    | Rel. Abu.                 | 100.000   | 6.974     | 1.437     |           |           |           |           |           |           |           |           |           |           |           |           |           |           |           |
| DP10            | -1 | Isotopic Mass (da)        | 1638.539  | 1639.541  | 1640.544  | 1641.546  | 1642.548  | 1643.551  |           |           |           |           |           |           |           |           |           |           |           |           |
|                 |    | Singly Charged Ionic Mass | 1637.532  | 1638.534  | 1639.536  | 1640.539  | 1641.541  | 1642.543  |           |           |           |           |           |           |           |           |           |           |           |           |
|                 |    | Expected m/z              | 1637.532  | 1638.534  | 1639.536  | 1640.539  | 1641.541  | 1642.543  |           |           |           |           |           |           |           |           |           |           |           |           |
|                 |    | Rel. Abu.                 | 100.000   | 69.139    | 33.995    | 12.486    | 3.862     | 1.032     |           |           |           |           |           |           |           |           |           |           |           |           |
| DP20            | -2 | Isotopic Mass (da)        | 3259.067  | 3260.069  | 3261.072  | 3262.074  | 3263.076  | 3264.079  | 3265.081  | 3266.083  |           |           |           |           |           |           |           |           |           |           |
|                 |    | Singly Charged Ionic Mass | 3258.060  | 3259.062  | 3260.065  | 3261.067  | 3262.069  | 3263.072  | 3264.074  | 3265.076  |           |           |           |           |           |           |           |           |           |           |
|                 |    | Expected m/z              | 1629.030  | 1629.531  | 1630.032  | 1630.533  | 1631.035  | 1631.536  | 1632.037  | 1632.538  |           |           |           |           |           |           |           |           |           |           |
|                 |    | Rel. Abu.                 | 72.353    | 100.000   | 83.564    | 51.818    | 26.237    | 11.376    | 4.356     | 1.503     |           |           |           |           |           |           |           |           |           |           |
| DP30            | -3 | Isotopic Mass (da)        | 4879.595  | 4880.598  | 4881.600  | 4882.602  | 4883.605  | 4884.607  | 4885.609  | 4886.612  | 4887.614  | 4888.617  |           |           |           |           |           |           |           |           |
|                 |    | Singly Charged Ionic Mass | 4878.588  | 4879.591  | 4880.593  | 4881.595  | 4882.598  | 4883.600  | 4884.602  | 4885.605  | 4886.607  | 4887.609  |           |           |           |           |           |           |           |           |
|                 |    | Expected m/z              | 1626.196  | 1626.530  | 1626.864  | 1627.198  | 1627.533  | 1627.867  | 1628.201  | 1628.535  | 1628.869  | 1629.203  |           |           |           |           |           |           |           |           |
|                 |    | Rel. Abu.                 | 40.866    | 84.708    | 100.000   | 85.962    | 59.467    | 34.901    | 17.956    | 8.279     | 3.476     | 1.345     |           |           |           |           |           |           |           |           |
| DP40            | -4 | Isotopic Mass (da)        | 6500.124  | 6501.126  | 6502.128  | 6503.131  | 6504.133  | 6505.135  | 6506.138  | 6507.140  | 6508.142  | 6509.145  | 6510.147  | 6511.149  |           |           |           |           |           |           |
|                 |    | Singly Charged Ionic Mass | 6499.116  | 6500.119  | 6501.121  | 6502.123  | 6503.126  | 6504.128  | 6505.130  | 6506.133  | 6507.135  | 6508.137  | 6509.140  | 6510.142  |           |           |           |           |           |           |
|                 |    | Expected m/z              | 1624.779  | 1625.030  | 1625.280  | 1625.531  | 1625.781  | 1626.032  | 1626.283  | 1626.533  | 1626.784  | 1627.034  | 1627.285  | 1627.536  |           |           |           |           |           |           |
|                 |    | Rel. Abu.                 | 21.662    | 59.863    | 91.331    | 100.000   | 87.235    | 64.097    | 41.056    | 23.464    | 12.167    | 5.797     | 2.562     | 1.059     |           |           |           |           |           |           |
| DP50            | -4 | Isotopic Mass (da)        | 8120.652  | 8121.654  | 8122.656  | 8123.659  | 8124.661  | 8125.664  | 8126.666  | 8127.668  | 8128.671  | 8129.673  | 8130.675  | 8131.678  | 8132.680  | 8133.682  |           |           |           |           |
|                 |    | Singly Charged Ionic Mass | 8119.645  | 8120.647  | 8121.649  | 8122.652  | 8123.654  | 8124.656  | 8125.659  | 8126.661  | 8127.663  | 8128.666  | 8129.668  | 8130.670  | 8131.673  | 8132.675  |           |           |           |           |
|                 |    | Expected m/z              | 2029.911  | 2030.162  | 2030.412  | 2030.663  | 2030.913  | 2031.164  | 2031.415  | 2031.665  | 2031.916  | 2032.166  | 2032.417  | 2032.668  | 2032.918  | 2033.169  |           |           |           |           |
|                 |    | Rel. Abu.                 | 11.090    | 38.309    | 71.671    | 95.204    | 100.000   | 87.974    | 67.170    | 45.595    | 27.996    | 15.754    | 8.207     | 3.990     | 1.823     | 0.786     |           |           |           |           |
| DP60            | -4 | Isotopic Mass (da)        | 9741.180  | 9742.182  | 9743.185  | 9744.187  | 9745.189  | 9746.192  | 9747.194  | 9748.196  | 9749.199  | 9750.201  | 9751.203  | 9752.206  | 9753.208  | 9754.210  | 9755.213  |           |           |           |
|                 |    | Singly Charged Ionic Mass | 9740.173  | 9741.175  | 9742.177  | 9743.180  | 9744.182  | 9745.184  | 9746.187  | 9747.189  | 9748.192  | 9749.194  | 9750.196  | 9751.199  | 9752.201  | 9753.203  | 9754.206  |           |           |           |
|                 |    | Expected m/z              | 2435.043  | 2435.294  | 2435.544  | 2435.795  | 2436.046  | 2436.296  | 2436.547  | 2436.797  | 2437.048  | 2437.298  | 2437.549  | 2437.800  | 2438.050  | 2438.301  | 2438.551  |           |           |           |
|                 |    | Rel. Abu.                 | 5.557     | 23.035    | 51.048    | 79.675    | 97.755    | 100.000   | 88.460    | 69.360    | 49.071    | 31.746    | 18.978    | 10.571    | 5.524     | 2.723     | 1.273     |           |           |           |
| DP70            | -5 | Isotopic Mass (da)        | 11361.708 | 11362.711 | 11363.713 | 11364.715 | 11365.718 | 11366.720 | 11367.722 | 11368.725 | 11369.727 | 11370.729 | 11371.732 | 11372.734 | 11373.736 | 11374.739 | 11375.741 | 11376.743 |           |           |
|                 |    | Singly Charged Ionic Mass | 11360.701 | 11361.703 | 11362.706 | 11363.708 | 11364.710 | 11365.713 | 11366.715 | 11367.717 | 11368.720 | 11369.722 | 11370.725 | 11371.727 | 11372.729 | 11373.732 | 11374.734 | 11375.736 |           |           |
|                 |    | Expected m/z              | 2272.140  | 2272.341  | 2272.541  | 2272.742  | 2272.942  | 2273.143  | 2273.343  | 2273.543  | 2273.744  | 2273.944  | 2274.145  | 2274.345  | 2274.546  | 2274.746  | 2274.947  | 2275.147  |           |           |
|                 |    | Rel. Abu.                 | 2.744     | 13.270    | 33.990    | 60.931    | 85.458    | 99.562    | 100.000   | 88.803    | 71.000    | 51.814    | 34.883    | 21.850    | 12.823    | 7.091     | 3.714     | 1.849     |           |           |
| DP80            | -5 | Isotopic Mass (da)        | 12982.236 | 12983.239 | 12984.241 | 12985.243 | 12986.246 | 12987.248 | 12988.251 | 12989.253 | 12990.255 | 12991.258 | 12992.260 | 12993.262 | 12994.265 | 12995.267 | 12996.269 | 12997.272 | 12998.274 | 12999.276 |
|                 |    | Singly Charged Ionic Mass | 12981.229 | 12982.232 | 12983.234 | 12984.236 | 12985.239 | 12986.241 | 12987.243 | 12988.246 | 12989.248 | 12990.250 | 12991.253 | 12992.255 | 12993.257 | 12994.260 | 12995.262 | 12996.264 | 12997.267 | 12998.269 |
|                 |    | Expected m/z              | 2596.246  | 2596.446  | 2596.647  | 2596.847  | 2597.048  | 2597.248  | 2597.449  | 2597.649  | 2597.850  | 2598.050  | 2598.251  | 2598.451  | 2598.651  | 2598.852  | 2599.052  | 2599.253  | 2599.453  | 2599.654  |
|                 |    | Rel. Abu.                 | 1.329     | 7.343     | 21.343    | 43.200    | 68.148    | 89.023    | 100.000   | 99.100    | 88.256    | 71.624    | 53.547    | 37.199    | 24.183    | 14.800    | 8.569     | 4.713     | 2.472     | 1.240     |
| DP90            | -5 | Isotopic Mass (da)        | 14603.767 | 14604.769 | 14605.772 | 14606.774 | 14607.776 | 14608.779 | 14609.781 | 14610.783 | 14611.786 | 14612.788 | 14613.790 | 14614.793 | 14615.795 | 14616.798 | 14617.800 | 14618.802 | 14619.805 | 14620.807 |
|                 |    | Singly Charged Ionic Mass | 14602.760 | 14603.762 | 14604.764 | 14605.767 | 14606.769 | 14607.772 | 14608.774 | 14609.776 | 14610.779 | 14611.781 | 14612.783 | 14613.786 | 14614.788 | 14615.790 | 14616.793 | 14617.795 | 14618.797 | 14619.800 |
|                 |    | Expected m/z              | 2920.552  | 2920.752  | 2920.953  | 2921.153  | 2921.354  | 2921.554  | 2921.755  | 2921.955  | 2922.156  | 2922.356  | 2922.557  | 2922.757  | 2922.958  | 2923.158  | 2923.359  | 2923.559  | 2923.759  | 2923.960  |
|                 |    | Rel. Abu.                 | 3.962     | 12.885    | 29.060    | 50.914    | 73.674    | 91.470    | 100.000   | 98.087    | 87.547    | 71.891    | 54.795    | 39.044    | 26.166    | 16.575    | 9.967     | 5.711     | 3.129     | 1.643     |
